# Supplementary material for: Inappropriately prescribed and over-the-counter antimicrobials in the Brazilian Amazon Basin: We need to promote more rational use even in remote places
Source: PubMed Central journal article supplement (PMC6075761; doi:10.1371/journal.pone.0201579), 2018-08-03
Supplement: pone.0201579.s001.pdf [file pone.0201579.s001.pdf]

Entrevistador: \_\_\_\_\_ N. do Questionário: |\_|\_|\_|  
Tempo/Entrevista: |\_|\_|\_| min Data: \_\_\_/\_\_\_/\_\_\_

### INFORMAÇÕES AO ENTREVISTADO:

Antes de começar, gostaria de lhe agradecer por participar da pesquisa e informar que a entrevista é voluntária. Caso o Sr. (a) não deseje responder alguma pergunta, por favor me avise, pois passaremos para a próxima.

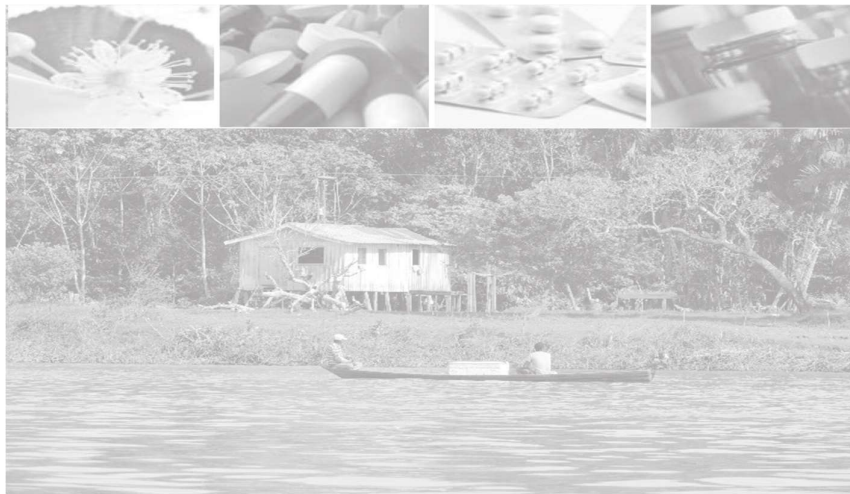

## AUTOMEDICAÇÃO EM COMUNIDADES RIBEIRINHAS NA REGIÃO DO MÉDIO SOLIMÕES – AMAZONAS

UNIVERSIDADE DE SÃO PAULO – ESCOLA DE ENFERMAGEM

ENFERMAGEM NA SAÚDE DO ADULTO

UNIVERSIDADE FEDERAL DO AMAZONAS

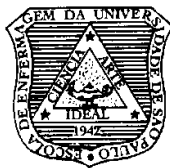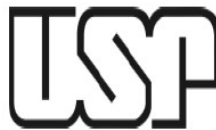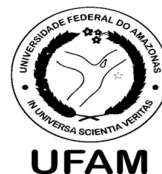

### ➤ INFORMAÇÕES GERAIS SOBRE O ENTREVISTADO E COMUNIDADE

- 1 - Entrevistado: \_\_\_\_\_  
2 - Comunidade: \_\_\_\_\_ 3 - Região: \_\_\_\_\_  
4 - ACS da Comunidade: \_\_\_\_\_  
5 - Origem: S \_\_\_ ° \_\_\_ ' \_\_\_ " W \_\_\_ ° \_\_\_ ' \_\_\_ " 6 - Domicílio: S \_\_\_ ° \_\_\_ ' \_\_\_ " W \_\_\_ ° \_\_\_ ' \_\_\_ "  
7 - N. do domicílio: |\_|\_|\_| 8 - Indivíduo: |\_|\_|\_| – Sua comunidade tem:  
9. Transporte comunitário? a. S  b. N  10. Posto de saúde? a. S  b. N   
11. Telefone público/orelhão? a. S  b. N

Observações: \_\_\_\_\_  
\_\_\_\_\_  
\_\_\_\_\_

**SEÇÃO A**  
**“INFORMAÇÕES SÓCIO-DEMOGRÁFICOS”**

**A.1** – Qual a data de seu nascimento?   /  /    
**“Não sabe informar, vá para A.2”**

**A.2** – Quantos anos o (a) Sr. (a) tem?   /  /  

**A.3** – Sexo: a. M  b. F

**A.4** – O (a) Sr. (a) tem filhos? a. S  b. N   
**“Não, vá para A.6”**

**A.5** - Quantos filhos nascidos vivos:   /  /  

**A.6** – O (a) Sr. (a) nasceu nesta comunidade?  
a. S  b. N  **“Sim, vá para A.8”**

**A.7** – Onde o (a) Sr. (a) morava anteriormente?  
\_\_\_\_\_

**A.8** - Há quanto tempo o (a) Sr. (a) mora nesta comunidade? a.   /  /   anos e   /  /   meses

**A.9** – O (a) Sr. (a) já frequentou a escola?  
a. S  b. N  **“Não, vá para A.11”**

**A.10** - Até qual série? \_\_\_\_\_

**A.11** – O (a) Sr. (a) sabe ler e escrever?  
a. S  b. N

**A.12** – Contando com o (a) Sr. (a), quantas pessoas moram em sua casa?

a. número   /  /  

– Informações sobre os moradores:

| Ord. | Idade | Sexo | Grau de parentesco |
|------|-------|------|--------------------|
| 1    |       |      |                    |
| 2    |       |      |                    |
| 3    |       |      |                    |
| 4    |       |      |                    |
| 5    |       |      |                    |
| 6    |       |      |                    |
| 7    |       |      |                    |
| 8    |       |      |                    |
| 9    |       |      |                    |
| 10   |       |      |                    |
| 11   |       |      |                    |
| 12   |       |      |                    |
| 13   |       |      |                    |
| 14   |       |      |                    |
| 15   |       |      |                    |

**A.13** - Qual é a sua religião?  
a. Católico  b. Evangélico  c. Espírita   
d. Nenhuma  e. Outra: \_\_\_\_\_

**A.14** - Qual o seu estado marital hoje?  
a. Solteiro  b. Separado  c. Viúvo   
d. Casado/Civil  e. Casado/Religioso   
f. Casado/Civil/Religioso  g. Mora junto

**A.15** – O (a) Sr. (a) considera a sua cor da pele:  
a. Branca  b. Parda/Moreno (a)   
c. Amarela  d. Negra ou preta  e. Indígena

**A.16** – Incluindo a sua renda, quanto é aproximadamente a renda de todas as pessoas que moram com o (a) Sr. (a)? R\$ \_\_\_\_\_

**A.17** – Com o que o (a) Sr. (a) trabalha ou faz durante o dia? \_\_\_\_\_

**A.18** - Na sua casa ou comunidade tem energia elétrica? a. S  b. N  **“Não, vá para A.20”**

**A.19** - Qual a fonte de geração?  
a. Motor  b. Amaz. Energia  c. E. solar

**A.20** – Na sua casa tem:  
a. Rádio: a. S  b. N  b. TV: a. S  b. N   
c. Celular: a. S  b. N  d. R. tran: a. S  b. N

**A.21** - Qual a origem da água que o (a) Sr. (a) usa para **cozinhar**?  
a. Rio  b. Igarapé  c. Poço  d. Chuva   
e. Lago  f. Outro : \_\_\_\_\_

**A.22** - A água para **cozinhar** é tratada?  
a. S  b. N  - Se sim, qual o produto? \_\_\_\_\_

**A.23** - Qual a origem da água que o (a) Sr. (a) usa para **beber**?  
a. Rio  b. Igarapé  c. Poço  d. Chuva   
e. Lago  f. Outro : \_\_\_\_\_

**A.24** - A água para **beber** é tratada?  
a. S  b. N  - Se sim, qual o produto? \_\_\_\_\_

**A.25** - Quantos cômodos tem sua casa?   /  /  

**A.26** - Quando o rio enche, entra água na sua casa? a. S  b. N

**A.27** - Como o (a) Sr. (a) faz para chegar até Coari, o transporte é?  
a. Alugado  b. Cedido  c. Próprio   
d. Recreio/Pago  e. Comunitário/público

**A.28** - Quanto tempo o (a) Sr. (a) demora para chegar até Coari, com o transporte que usa normalmente?   /  /   horas e   /  /   minutos

**A.29** - De quanto em quanto tempo o (a) Sr. (a) costuma ir em Coari?  
a. Todos dias  b. Até 3 vezes por semana   
c. 1 vez por semana  d. 1 vez por quinzena   
e. 1 vez por mês  f. Não costumo ir   
- Se “f”, quanto tempo faz desde a última vez?  
  /  /   anos   /  /   meses

**SEÇÃO B**  
**“ACESSO AOS SERVIÇOS DE SAÚDE”**

**B.1** – Quando o (a) Sr. (a) fica doente, quem costuma procurar primeiro?

- a. Médico  b. Enfermeiro  c. Dentista   
d. Farmacêutico  e. ACS  f. Rezador   
g. Amigo, vizinho ou conhecido  h. Pegador   
i. Curandeiro  j. Não procuro   
k. Outro  \_\_\_\_\_

**B.2** – Qual serviço de saúde o (a) Sr. (a) prefere utilizar quando está doente?

- a. Posto de Saúde/Centro  b. HRC   
c. IMTC  d. Outro Posto de Saúde   
e. Policlínica  f. Clínica/particular   
g. Farmácia  h. Nunca fui/serviço de saúde   
i. Outro : \_\_\_\_\_

**B.3** – No último mês, o (a) Sr. (a) procurou algum serviço de saúde para cuidar de sua saúde?

- a. **S**  b. **N**  **“Não, vá para B.8”**

**B.4** - Quanto tempo o (a) Sr. (a) levou para procurar o serviço de saúde? \_\_\_\_\_

**B.5** - O (a) Sr. (a) resolveu seu problema de saúde? **S**  **N**  **“Sim, vá para B.8”**

**B.6** – Por que não foi resolvido?  
\_\_\_\_\_  
\_\_\_\_\_

**B.7** – O que fez para resolver o seu problema?  
\_\_\_\_\_  
\_\_\_\_\_

**B.8** - Como o (a) Sr. (a) costuma chegar até o serviço de saúde?

- a. Lancha da comunidade  b. Rabeta   
c. Canoa a remo  d. Recreio/pago  d. Barco   
e. A pé  f. Moto  g. Caminhão   
h. Outro : \_\_\_\_\_

**B.9** - Quanto tempo o (a) Sr. (a) costuma levar para chegar ao serviço de saúde quando precisa? |\_\_|\_\_| horas e |\_\_|\_\_| minutos

**B.10** – O (a) Sr. (a) já precisou fazer acompanhamento de alguma doença?

- a. **S**  b. **N**  **“Não, vá para B.12”**

**B.11** – Teve alguma dificuldade?

- a. **S**  b. **N**

c. Se “sim”, qual a dificuldade?  
\_\_\_\_\_  
\_\_\_\_\_

**B.12** – Quando o (a) Sr. (a) está doente, e o profissional de saúde marca um exame, o (a) Sr. (a) consegue fazer?

- a. **S**  b. **N**  c. Nunca fiz exame

**“Sim, vá para B.14”**

**B.13** – Qual a dificuldade em fazer o exame?  
\_\_\_\_\_  
\_\_\_\_\_

**B.14** – O (a) Sr. (a) já tentou tirar uma ficha ou marcar uma consulta e não conseguiu?

- a. **S**  b. **N**  c. Nunca consultei

**“Não, vá para B.16”**

**B.15** – Por que não conseguiu?  
\_\_\_\_\_  
\_\_\_\_\_

**B.16** – Se um profissional de saúde, passa um remédio para o (a) Sr. (a) tomar, você consegue o remédio?

- a. **S**  b. **N**  c. Nunca passou remédio

**“Sim, pule para próxima seção”**

**B.17** – Qual o motivo de não conseguir o remédio?  
\_\_\_\_\_  
\_\_\_\_\_

**SEÇÃO C**  
**“AUDIT ADAPTADO - RIBEIRINHOS”**

**C.1** - Com que frequência o (a) Sr. (a) consome bebidas alcoólicas?

- (0) Nunca  **“NUNCA, vá próxima seção”**  
(1) Mensalmente ou menos   
(2) De 2 a 4 vezes por mês   
(3) De 2 a 3 vezes por semana   
(4) 4 ou mais vezes por semana

**C.2** – Nas ocasiões em que bebe, o que bebe? I \_\_\_\_\_ I. Quantas doses

o (a) Sr. (a)? **(Ver próxima página, ilustração sobre as doses - AUDIT)**

- (0) 0 ou 1   
(1) 2 ou 3   
(2) 4 ou 5   
(3) 6 ou 7   
(4) 8 ou mais

**C.3** - Quantas vezes o (a) Sr. (a) toma 6 ou mais doses em uma mesma ocasião?

- (0) Nunca   
(1) Menos do que uma vez ao mês   
(2) Mensalmente   
(3) Semanalmente   
(4) Todos ou quase todos os dias

**“Se a soma das questões C.2 e C.3 for 0, avance para as questões C.9 e C.10”**

**C.4** – Durante o último ano, quantas vezes o (a) Sr. (a) achou que não conseguiria parar de beber depois de ter começado?

- (0) Nunca   
(1) Menos que uma vez ao mês   
(2) Mensalmente   
(3) Semanalmente   
(4) Todos ou quase todos os dias

**C.5** – Durante o último ano, quantas vezes depois de ter bebido, o (a) Sr. (a) deixou de fazer alguma coisa que normalmente faria?

- (0) Nunca   
(1) Menos que uma vez ao mês   
(2) Mensalmente   
(3) Semanalmente   
(4) Todos ou quase todos os dias

**C.6** – Durante o último ano, quantas vezes o (a) Sr. (a) precisou beber pela manhã para se sentir bem depois ter bebido muito/pesadamente no dia ou na noite anterior?

- (0) Nunca   
(1) Menos que uma vez ao mês   
(2) Mensalmente   
(3) Semanalmente   
(4) Todos ou quase todos os dias

**C.7** – Durante o último ano, quantas vezes o (a) Sr. (a) se sentiu culpado ou com remorso depois de ter bebido?

- (0) Nunca   
(1) Menos que uma vez ao mês   
(2) Mensalmente   
(3) Semanalmente   
(4) Todos ou quase todos os dias

**C.8** - Durante o último ano, quantas vezes o (a) Sr. (a) não foi capaz de lembrar o que aconteceu depois de ter bebido na noite anterior?

- (0) Nunca   
(1) Menos que uma vez ao mês   
(2) Mensalmente   
(3) Semanalmente   
(4) Todos ou quase todos os dias

**C.9** - Já aconteceu do (a) Sr. (a) ferir ou magoar alguém ou de te ferir ou te magoar por causa de ter bebido?

- (0) Não   
(2) Sim, mas não nos últimos 12 meses   
(4) Sim, nos últimos 12 meses

**C.10** - Algum parente, amigo, médico ou outro profissional já ficou preocupado com a forma que (a) Sr. (a) bebe ou sugeriu que diminuísse?

- (0) Não   
(2) Sim, mas não nos últimos 12 meses   
(4) Sim, nos últimos 12 meses

**SEÇÃO D**  
**“HÁBITO TABAGISTA”**

**D.1** – O (a) Sr. (a) é ou já foi fumante (pelo menos 100 cigarros ao longo da vida)? a. **S**

**D.1.1** – O que costuma (va) fumar?

b. **N**  **“Não, vá para seção seguinte”**

**D.2** – Com que idade o (a) Sr. (a) começou a fumar? I\_\_I\_\_I anos

**D.3** – O (a) Sr. (a) fuma cigarros atualmente?

a. **S**  **(Sim, vá para D.5)** b. **N**

**D.4** – Com que idade o (a) Sr. (a) parou de fumar pela última vez? I\_\_I\_\_I anos

**D.5** – Em geral, quantos cigarros por dia o (a) Sr. (a) fuma (ou fumava)?

I\_\_I\_\_I cigarros (se <1, marque 0)

**D.6** – Ao todo, durante quantos anos o (a) Sr. (a) fumou ou fuma?

I\_\_I\_\_I anos (se <1, marque 0)

**SEÇÃO E**  
**“ENFERMIDADES AUTO-RELATADAS”**

**E.1** – O (a) Sr. (a) diria que sua saúde é?  
a. Muito boa  b. Boa  c. Regular   
d. Ruim  e. Muito ruim

**E.2** – No último mês, o (a) Sr. (a) teve algum problema de saúde, ou um profissional de saúde lhe disse que o (a) Sr. (a) tinha algum problema?  
a. **S**  b. **N**

**“Não, vá para E.4**

**E.3** - Qual foi o problema de saúde?

|    | <b>Enfermidades</b>             | <b>Último mês</b>        |
|----|---------------------------------|--------------------------|
| a  | Malária                         | <input type="checkbox"/> |
| b  | Verminoses                      | <input type="checkbox"/> |
| c  | Doença de Chagas                | <input type="checkbox"/> |
| d  | Hepatite                        | <input type="checkbox"/> |
| e  | Diarreia                        | <input type="checkbox"/> |
| f  | Pressão alta                    | <input type="checkbox"/> |
| g  | Diabetes                        | <input type="checkbox"/> |
| h  | Derrame                         | <input type="checkbox"/> |
| i  | Câncer                          | <input type="checkbox"/> |
| j  | Reumatismo                      | <input type="checkbox"/> |
| k  | Doença no coração               | <input type="checkbox"/> |
| l  | Doença nos rins                 | <input type="checkbox"/> |
| m  | Doenças nos olhos               | <input type="checkbox"/> |
| n  | Alergia                         | <input type="checkbox"/> |
| o  | Asma                            | <input type="checkbox"/> |
| p  | Anemia                          | <input type="checkbox"/> |
| q  | Gripe                           | <input type="checkbox"/> |
| r  | Doenças pulmonares              | <input type="checkbox"/> |
| s  | Infecção urinária               | <input type="checkbox"/> |
| t  | Amidalite                       | <input type="checkbox"/> |
| u  | Fraqueza/vertigem/tontura       | <input type="checkbox"/> |
| v  | Azia (gastura)                  | <input type="checkbox"/> |
| x  | Vômitos (provocou)              | <input type="checkbox"/> |
| z  | Falta de ar                     | <input type="checkbox"/> |
| w  | Cansa facilmente                | <input type="checkbox"/> |
| aa | Pressão na cabeça               | <input type="checkbox"/> |
| ab | Febre                           | <input type="checkbox"/> |
| ac | Torção (desmintidura)           | <input type="checkbox"/> |
| ad | Doença mental                   | <input type="checkbox"/> |
| ae | Depressão                       | <input type="checkbox"/> |
|    | Outros, especifique abaixo:     |                          |
| af |                                 | <input type="checkbox"/> |
| ag |                                 | <input type="checkbox"/> |
| ah |                                 | <input type="checkbox"/> |
| ai |                                 | <input type="checkbox"/> |
| aj |                                 | <input type="checkbox"/> |
| ak |                                 | <input type="checkbox"/> |
| al | Dor (especificar local da dor): | <input type="checkbox"/> |
|    |                                 |                          |
|    |                                 |                          |

**E.4** - Alguma vez o (a) Sr. (a) sentiu dor ou desconforto no peito?

a. **S**  b. **N**  **“Não” vá para seção seguinte”**

**E.5** - Esta dor ou desconforto aparece quando o (a) Sr. (a) caminha rápido ou trabalha no roçado?

a. **S**  b. **N**

**E.6** - Esta dor ou desconforto aparece quando o (a) Sr. (a) caminha devagar em terreno plano?

a. **S**  b. **N**

**“ILUSTRAÇÃO AUDIT”**

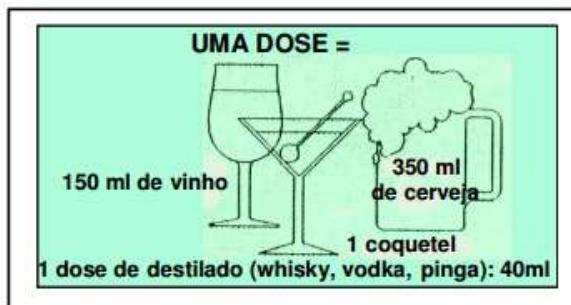

**SEÇÃO F**  
**“INFORMAÇÕES SOBRE O CONSUMO DE**  
**MEDICAMENTOS”**

**F.1** – O (a) Sr. (a) usa “remédios de farmácia” por conta própria? a. **S**  b. **N**

**F.2** – O (a) Sr. (a) guarda algum “remédio de farmácia” em casa? a. **S**  b. **N**   
**“Não, vá para E.5”**

**F.3** - Onde guarda seus “remédios de farmácia” em casa (peça para mostrar o local)?

\_\_\_\_\_

\_\_\_\_\_

**⇒ SE POSSÍVEL, PEÇA A CAIXINHA DE MEDICAMENTOS.**

**F.4** – Características do local onde os “remédios de farmácia” são guardados na residência (observação do entrevistador)?

a. Contato direto dos raios solares

b. Contato com umidade

c. Contato direto com calor

d. Outras observações do entrevistador:

\_\_\_\_\_

\_\_\_\_\_

**F.5** - Como o (a) Sr. (a) identifica seus “remédios de farmácia”?

a. Pela cor  b. Pelo tamanho  c. Pela forma

d. Pelo nome  e. Pela embalagem

f. Não identifica  g. Outro : \_\_\_\_\_

**F.6** - De um modo geral o (a) Sr. (a) costuma ler a bula dos remédios ou pede para alguém ler? a. **S**  b. **N**

**F.7** - O (a) Sr. (a) acha que os “remédios de farmácia” podem fazer mal a sua saúde? a. **S**  b. **N**

**F.8** - O (a) Sr. (a) costuma ver a validade de seus “remédios de farmácia”? a. **S**  b. **N**

**F.9** - O (a) Sr. (a) já tomou algum “remédio de farmácia” vencido? a. **S**  b. **N**  c. Não sei informar

**F.10** – Quando o “remédio de farmácia” que o (a) Sr. (a) tem em sua casa, vence, onde costuma jogar seus remédios?

\_\_\_\_\_

\_\_\_\_\_

**F.11** - O (a) Sr. (a) costuma guardar o “remédio de farmácia” dentro das caixinhas (embalagem secundária)? a. **S**  b. **N**

**F.12** - O (a) Sr. (a) costuma retirar os comprimidos da cartela dos “remédios de farmácia” para guardar em outro local? a. **S**  b. **N**

**F.13** – O (a) Sr. (a) costuma aproveitar os potes de “remédios de farmácia”? a. **S**  b. **N**

**F.14** – O (a) Sr. (a) usou remédio caseiro no último mês? a. **S**  b. **N**  **“Não, vá para F.18”**

**F.15** – Qual remédio caseiro usou?

\_\_\_\_\_

\_\_\_\_\_

**F.16** – Para que usou o remédio caseiro?

\_\_\_\_\_

\_\_\_\_\_

**F.17** – Quem lhe ensinou usar?

\_\_\_\_\_

\_\_\_\_\_

**F.18** – Quando o (a) Sr. (a) está doente, o que prefere usar:

a. Remédio caseiro

b. Remédio de farmácia

c. Remédio Caseiro e de farmácia

d. Não uso nada

**F.19** – Por que?

\_\_\_\_\_

\_\_\_\_\_

**F.20** - O (a) Sr. (a) tomou algum “remédio de farmácia” no último mês? a. **S**  b. **N**

**“Entrevistado (a) não tomou remédio de farmácia no último mês, VÁ PARA PRÓXIMA SEÇÃO”**

**⇒ CASO O ENTREVISTADO TENHA TOMADO REMÉDIO DE FARMÁCIA NO ÚLTIMO MÊS, PEÇA PARA MOSTRAR A RECEITA MÉDICA (SE HOUVER) E O MEDICAMENTO.**

**⇒ PREENCHA O QUADRO ABAIXO COM AS INFORMAÇÕES EMITIDAS PELO ENTREVISTADO.**

| REMÉDIO DE FARMÁCIA (MEDICAMENTO ALOPÁTICO) |                                                       |                                               |                                                                                                                                                                                                                                                                                                                                                                           |                                                                                                                                                                                                                                                                                                                                                                          |                         |
|---------------------------------------------|-------------------------------------------------------|-----------------------------------------------|---------------------------------------------------------------------------------------------------------------------------------------------------------------------------------------------------------------------------------------------------------------------------------------------------------------------------------------------------------------------------|--------------------------------------------------------------------------------------------------------------------------------------------------------------------------------------------------------------------------------------------------------------------------------------------------------------------------------------------------------------------------|-------------------------|
| Ord.                                        | F.21                                                  | F.22                                          | F.23                                                                                                                                                                                                                                                                                                                                                                      | F.24                                                                                                                                                                                                                                                                                                                                                                     | F.25                    |
|                                             | Nome do "remédio de farmácia" (medicamento alopático) | Tempo de uso                                  | Quem indicou?                                                                                                                                                                                                                                                                                                                                                             | Onde conseguiu o "remédio de farmácia"?                                                                                                                                                                                                                                                                                                                                  | Para que usou?          |
| a                                           | _____                                                 | Dias    _ _ <br>Meses    _ _ <br>Anos     _ _ | (a) Médico <input type="checkbox"/> (b) Dentista <input type="checkbox"/><br>(c) Farmacêutico <input type="checkbox"/> (d) Enfermeira <input type="checkbox"/><br>(e) ACS <input type="checkbox"/> (f) Conta própria <input type="checkbox"/><br>(g) Vizinho/amigo <input type="checkbox"/> (h) Familiar <input type="checkbox"/><br>(i) Outro <input type="checkbox"/> : | (a) Farmácia <input type="checkbox"/> (b) Posto de Saúde <input type="checkbox"/><br>(c) Hospital <input type="checkbox"/> (d) IMTC <input type="checkbox"/> (e) Policlínica <input type="checkbox"/><br>(f) ACS <input type="checkbox"/> (g) Vizinho/amigo <input type="checkbox"/><br>(h) Familiar <input type="checkbox"/> (i) Outro <input type="checkbox"/> : _____ | _____<br>_____<br>_____ |
| b                                           | _____                                                 | Dias    _ _ <br>Meses    _ _ <br>Anos     _ _ | (a) Médico <input type="checkbox"/> (b) Dentista <input type="checkbox"/><br>(c) Farmacêutico <input type="checkbox"/> (d) Enfermeira <input type="checkbox"/><br>(e) ACS <input type="checkbox"/> (f) Conta própria <input type="checkbox"/><br>(g) Vizinho/amigo <input type="checkbox"/> (h) Familiar <input type="checkbox"/><br>(i) Outro <input type="checkbox"/> : | (a) Farmácia <input type="checkbox"/> (b) Posto de Saúde <input type="checkbox"/><br>(c) Hospital <input type="checkbox"/> (d) IMTC <input type="checkbox"/> (e) Policlínica <input type="checkbox"/><br>(f) ACS <input type="checkbox"/> (g) Vizinho/amigo <input type="checkbox"/><br>(h) Familiar <input type="checkbox"/> (i) Outro <input type="checkbox"/> : _____ | _____<br>_____<br>_____ |
| c                                           | _____                                                 | Dias    _ _ <br>Meses    _ _ <br>Anos     _ _ | (a) Médico <input type="checkbox"/> (b) Dentista <input type="checkbox"/><br>(c) Farmacêutico <input type="checkbox"/> (d) Enfermeira <input type="checkbox"/><br>(e) ACS <input type="checkbox"/> (f) Conta própria <input type="checkbox"/><br>(g) Vizinho/amigo <input type="checkbox"/> (h) Familiar <input type="checkbox"/><br>(i) Outro <input type="checkbox"/> : | (a) Farmácia <input type="checkbox"/> (b) Posto de Saúde <input type="checkbox"/><br>(c) Hospital <input type="checkbox"/> (d) IMTC <input type="checkbox"/> (e) Policlínica <input type="checkbox"/><br>(f) ACS <input type="checkbox"/> (g) Vizinho/amigo <input type="checkbox"/><br>(h) Familiar <input type="checkbox"/> (i) Outro <input type="checkbox"/> : _____ | _____<br>_____<br>_____ |
| d                                           | _____                                                 | Dias    _ _ <br>Meses    _ _ <br>Anos     _ _ | (a) Médico <input type="checkbox"/> (b) Dentista <input type="checkbox"/><br>(c) Farmacêutico <input type="checkbox"/> (d) Enfermeira <input type="checkbox"/><br>(e) ACS <input type="checkbox"/> (f) Conta própria <input type="checkbox"/><br>(g) Vizinho/amigo <input type="checkbox"/> (h) Familiar <input type="checkbox"/><br>(i) Outro <input type="checkbox"/> : | (a) Farmácia <input type="checkbox"/> (b) Posto de Saúde <input type="checkbox"/><br>(c) Hospital <input type="checkbox"/> (d) IMTC <input type="checkbox"/> (e) Policlínica <input type="checkbox"/><br>(f) ACS <input type="checkbox"/> (g) Vizinho/amigo <input type="checkbox"/><br>(h) Familiar <input type="checkbox"/> (i) Outro <input type="checkbox"/> : _____ | _____<br>_____<br>_____ |
| e                                           | _____                                                 | Dias    _ _ <br>Meses    _ _ <br>Anos     _ _ | (a) Médico <input type="checkbox"/> (b) Dentista <input type="checkbox"/><br>(c) Farmacêutico <input type="checkbox"/> (d) Enfermeira <input type="checkbox"/><br>(e) ACS <input type="checkbox"/> (f) Conta própria <input type="checkbox"/><br>(g) Vizinho/amigo <input type="checkbox"/> (h) Familiar <input type="checkbox"/><br>(i) Outro <input type="checkbox"/> : | (a) Farmácia <input type="checkbox"/> (b) Posto de Saúde <input type="checkbox"/><br>(c) Hospital <input type="checkbox"/> (d) IMTC <input type="checkbox"/> (e) Policlínica <input type="checkbox"/><br>(f) ACS <input type="checkbox"/> (g) Vizinho/amigo <input type="checkbox"/><br>(h) Familiar <input type="checkbox"/> (i) Outro <input type="checkbox"/> : _____ | _____<br>_____<br>_____ |
| f                                           | _____                                                 | Dias    _ _ <br>Meses    _ _ <br>Anos     _ _ | (a) Médico <input type="checkbox"/> (b) Dentista <input type="checkbox"/><br>(c) Farmacêutico <input type="checkbox"/> (d) Enfermeira <input type="checkbox"/><br>(e) ACS <input type="checkbox"/> (f) Conta própria <input type="checkbox"/><br>(g) Vizinho/amigo <input type="checkbox"/> (h) Familiar <input type="checkbox"/><br>(i) Outro <input type="checkbox"/> : | (a) Farmácia <input type="checkbox"/> (b) Posto de Saúde <input type="checkbox"/><br>(c) Hospital <input type="checkbox"/> (d) IMTC <input type="checkbox"/> (e) Policlínica <input type="checkbox"/><br>(f) ACS <input type="checkbox"/> (g) Vizinho/amigo <input type="checkbox"/><br>(h) Familiar <input type="checkbox"/> (i) Outro <input type="checkbox"/> : _____ | _____<br>_____<br>_____ |
| g                                           | _____                                                 | Dias    _ _ <br>Meses    _ _ <br>Anos     _ _ | (a) Médico <input type="checkbox"/> (b) Dentista <input type="checkbox"/><br>(c) Farmacêutico <input type="checkbox"/> (d) Enfermeira <input type="checkbox"/><br>(e) ACS <input type="checkbox"/> (f) Conta própria <input type="checkbox"/><br>(g) Vizinho/amigo <input type="checkbox"/> (h) Familiar <input type="checkbox"/><br>(i) Outro <input type="checkbox"/> : | (a) Farmácia <input type="checkbox"/> (b) Posto de Saúde <input type="checkbox"/><br>(c) Hospital <input type="checkbox"/> (d) IMTC <input type="checkbox"/> (e) Policlínica <input type="checkbox"/><br>(f) ACS <input type="checkbox"/> (g) Vizinho/amigo <input type="checkbox"/><br>(h) Familiar <input type="checkbox"/> (i) Outro <input type="checkbox"/> : _____ | _____<br>_____<br>_____ |

## SEÇÃO H “DADOS NUTRICIONAIS”

H.1 - Quantas refeições o (a) Sr. (a) faz ao dia (considere café da manhã, almoço, jantar e merendas)? \_\_\_\_

H.2 - Quantas vezes por semana você come os alimentos abaixo?

| Ord. | ALIMENTOS                                                                       | Nunca<br>quase<br>nunca | 1x/<br>mês | 2 x/<br>mês | 1x/<br>sem | 2-3 x/<br>sem | 4-5x/<br>sem | Todos<br>os dias |
|------|---------------------------------------------------------------------------------|-------------------------|------------|-------------|------------|---------------|--------------|------------------|
| 1    | Carne vermelha (boi)                                                            |                         |            |             |            |               |              |                  |
| 2    | Carne vermelha (porco)                                                          |                         |            |             |            |               |              |                  |
| 3    | Carne vermelha (caça)                                                           |                         |            |             |            |               |              |                  |
| 4    | Carne de aves (Frango, galinha, pato)                                           |                         |            |             |            |               |              |                  |
| 5    | Peixes                                                                          |                         |            |             |            |               |              |                  |
| 6    | Ovos                                                                            |                         |            |             |            |               |              |                  |
| 7    | Feijão                                                                          |                         |            |             |            |               |              |                  |
| 8    | Arroz ou macarrão                                                               |                         |            |             |            |               |              |                  |
| 9    | Farinhas e pães (mandioca, beiju, rosca)                                        |                         |            |             |            |               |              |                  |
| 10   | Leite                                                                           |                         |            |             |            |               |              |                  |
| 11   | Verduras de folhas (alface, couve, etc)                                         |                         |            |             |            |               |              |                  |
| 12   | Legumes (cenoura, jerimum, beterraba, etc)                                      |                         |            |             |            |               |              |                  |
| 13   | Legumes tubérculos (macaxeira, cará, batata)                                    |                         |            |             |            |               |              |                  |
| 14   | Frutas ou suco de fruta natural                                                 |                         |            |             |            |               |              |                  |
| 15   | Açaí                                                                            |                         |            |             |            |               |              |                  |
| 16   | Pupunha                                                                         |                         |            |             |            |               |              |                  |
| 17   | Tucumã                                                                          |                         |            |             |            |               |              |                  |
| 18   | Guaraná natural                                                                 |                         |            |             |            |               |              |                  |
| 19   | Castanha                                                                        |                         |            |             |            |               |              |                  |
| 20   | Açúcar                                                                          |                         |            |             |            |               |              |                  |
| 21   | Doces (bombons, chiclete, pirulito)                                             |                         |            |             |            |               |              |                  |
| 22   | Produtos industrializados (carne enlatada, salsicha enlatada, salgadinhos, etc) |                         |            |             |            |               |              |                  |

### SEÇÃO I “SCREENING PARA FRAGILIDADE” (Idosos ≥ de 60 anos)

I.1 - Nos últimos 12 meses, o (a) Sr. (a) se sente mais enfraquecido (a), acha que sua força diminuiu? a. **S**  b. **N**

I.2 - Atualmente, o (a) Sr. (a) faz menos atividades físicas do que fazia há 12 meses atrás (há um ano)? a. **S**  b. **N**

I.3 - Atualmente, o (a) Sr. (a) acredita que está caminhando mais devagar do que há 12 meses atrás (há um ano / demora mais tempo para fazer o mesmo percurso que fazia antes, como ir à igreja, na cidade, etc)? a. **S**  b. **N**

I.4 - Com que frequência, na última semana, o (a) Sr. (a) sentiu que não conseguiria levar adiante suas coisas (iniciava alguma coisa mas não conseguia terminar):  
a. Nunca ou raramente (< de 1 dia)   
b. Poucas vezes (1-2 dias)  c. Algumas vezes (3-4 dias)   
d. A maior parte de tempo

I.5 - Com que frequência, na última semana, a realização de suas atividades rotineiras exigiram do (a) Sr. (a) um grande esforço para serem realizadas:  
a. Nunca ou raramente (< de 1 dia)   
b. Poucas vezes (1-2 dias)  c. Algumas vezes (3-4 dias)   
d. A maior parte de tempo

### SEÇÃO J “DADOS ANTROPOMÉTRICOS, PRESSÃO ARTERIAL, GLICEMIA CAPILAR E TIPAGEM SANGÜÍNEA”

J.1 – Pressão arterial:

a. (1) \_\_\_x\_\_\_ mmHg      b. (2) \_\_\_x\_\_\_ mmHg  
c. (3) \_\_\_x\_\_\_ mmHg

J.2 - Impossibilitado de realizar medidas antropométricas: Motivo? \_\_\_\_\_

J.3 - Estatura \_\_\_ cm      J.4 – Peso \_\_\_ kg

J.5 - Circunferência da cintura \_\_\_\_\_ cm

J.6 – C. quadril \_\_\_ cm      J.7 – C. braço \_\_\_ cm

J.8 – C. panturrilha \_\_\_ cm      J.9 - FC: \_\_\_ bpm

J.10 - Há quanto tempo o (a) Sr. (a) se alimentou a última vez? |\_|\_| horas e |\_|\_| minutos

J.11 – O que o (a) Sr. (a) comeu na sua última refeição? \_\_\_\_\_

J.12 – Glicemia capilar \_\_\_\_\_

J.13 – Você sabe qual o seu tipo sanguíneo?

a. **S**       b. **N**       c. Qual? \_\_\_\_\_

J.14 – Tipo sanguíneo: ABO |\_|\_| Rh |\_|\_|
