# Supplementary material for: Inappropriately prescribed and over-the-counter antimicrobials in the Brazilian Amazon Basin: We need to promote more rational use even in remote places
Source: PubMed Central journal article supplement (PMC6075761; doi:10.1371/journal.pone.0201579), 2018-08-03
Supplement: pone.0201579.s002.pdf [file pone.0201579.s002.pdf]

Interviewer: \_\_\_\_\_ Survey Nr: |\_|\_|\_|\_|  
 Survey time: |\_|\_|\_| min Date: \_\_\_/\_\_\_/\_\_\_

**INFORMATIONS FOR THE INTERVIEWEE**

First of all, I would like to express our gratitude for your participation in this survey. This is a voluntary survey; in the case you prefer not to take part of it, please tell me. If you prefer not to answer a specific question, please tell me too.

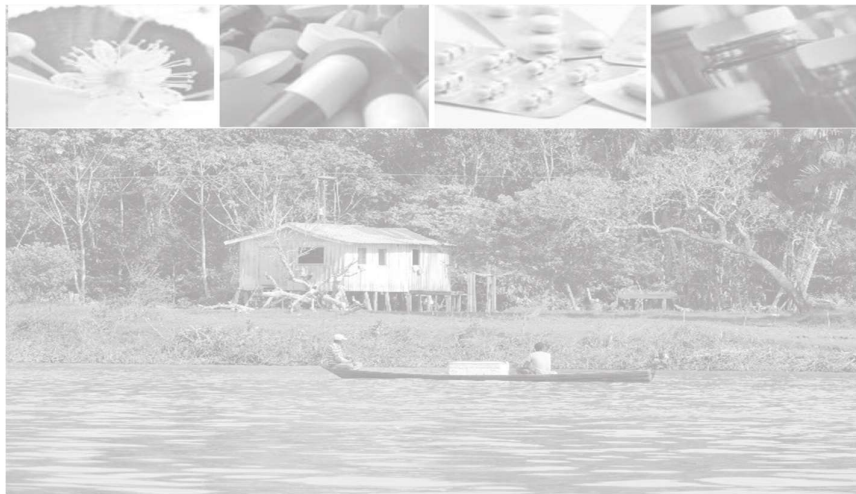

# SELF-MEDICATION IN RIVER DWELLER COMMUNITIED OF THE MÉDIO SOLIMÕES REGION – AMAZONAS

UNIVERSIDADE DE SÃO PAULO – ESCOLA DE ENFERMAGEM  
 ENFERMAGEM NA SAÚDE DO ADULTO  
 UNIVERSIDADE FEDERAL DO AMAZONAS

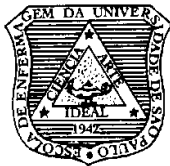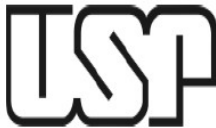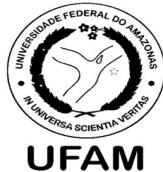

➤ **GENERAL INFORMATION ABOUT THE COMMUNITY**

1 - Interviewee: \_\_\_\_\_  
 2 - Community: \_\_\_\_\_ 3 - Region: \_\_\_\_\_  
 4 - Community ACS: \_\_\_\_\_  
 5 - Origin: S \_\_\_° \_\_\_' \_\_\_" W \_\_\_° \_\_\_' \_\_\_" 6 - Address: S \_\_\_° \_\_\_' \_\_\_" W \_\_\_° \_\_\_' \_\_\_"  
 7 - Hose Nr: |\_|\_|\_| 8 - Person Nr: |\_|\_|\_| - The community has:  
 9. Public transportation? a. Y  b. N  10. Health Center? a. Y  b. N   
 11. Public phone? a. Y  b. N

**Observations:** \_\_\_\_\_  
 \_\_\_\_\_  
 \_\_\_\_\_

**SECTION A**  
**“SOCIODEMOGRAPHIC INFORMATION”**

**A.1** – Birthdate?   /  /    
**“Do not know”, go to A.2**

**A.2** – How old are you? |    |    |

**A.3** – Sex: a. M  b. F

**A.4** – Family? a. Y  b. N   
**“No”, go to A.6**

**A.5** – How many live children?: |    |    |

**A.6** – Have you born in this community?  
a. Y  b. N  **“Yes”, go to A.8”**

**A.7** – Where did you live before?  
\_\_\_\_\_

**A.8** – When did you arrive at the community?  
a. |    |    | Year |    |    | Month

**A.9** – Did you go to the school?  
a. Y  b. N  **“No”, go to A.11**

**A.10** – Last degree? \_\_\_\_\_

**A.11** – Can you read/write?  
a. Y  b. N

**A.12** – How many people are leaving in this house?

a. Nr |    |    |

– Informations on the residents:

| Ord. | Age | Sex | Kinship |
|------|-----|-----|---------|
| 1    |     |     |         |
| 2    |     |     |         |
| 3    |     |     |         |
| 4    |     |     |         |
| 5    |     |     |         |
| 6    |     |     |         |
| 7    |     |     |         |
| 8    |     |     |         |
| 9    |     |     |         |
| 10   |     |     |         |
| 11   |     |     |         |
| 12   |     |     |         |
| 13   |     |     |         |
| 14   |     |     |         |
| 15   |     |     |         |

**A.13** - Religion?  
a. Catholic  b. Evangelic  c. Spirit   
d. None  e. Other: \_\_\_\_\_

**A.14** – Marital status?  
a. Single  b. Divorced  c. Widow   
d. Married/ civil  e. Married/religious   
f. Married/Both  g. Living together

**A.15** – Skin color:  
a. White  b. Swarthy   
c. Yellow  d. Black  e. Indigenous

**A.16** – Total home income? R\$ \_\_\_\_\_

**A.17** – Occupation?  
\_\_\_\_\_

**A.18** – Do you have electricity? a. Y  b. N   
**“No”, go to A.20**

**A.19** – Power source?  
a. Engine  b. Battery  c. Solar

**A.20** – Do you have:  
a. Radio: a. Y  b. N  b. TV: a. Y  b. N   
c. Phone: a. Y  b. N  d. R. transm: a. Y  b. N

**A.21** – Water source / **cooking**?  
a. Rivero  b. Igarapé  c. Well  d. Rain   
e. Lake  f. Other : \_\_\_\_\_

**A.22** – Is **cooking** water treated??  
a. Y  b. N  - If Yes, product name? \_\_\_\_\_

**A.23** – Water source / **drinking**?  
a. River  b. Igarapé  c. Well  d. Rain   
e. Lake  f. Other : \_\_\_\_\_

**A.24** – Is **drinking** water treated?  
a. Y  b. N  - If Yes, product name? \_\_\_\_\_

**A.25** – Number of rooms? |    |    |

**A.26** – When the river rises, your home is flooded? a. Y  b. N

**A.27** – You reach Coari by transportation?  
a. Rented  b. Lend  c. Own   
d. Paid  e. Public

**A.28** – How long does it take to reach Coari?  
|    |    | hours |    |    | minutes

**A.29** – When do you use to go to Coari?  
a. Daily  b. 3 times/week  c. 1 time/week   
d. 2 times/month   
e. 1 time/month  f. Do not use to go   
- If “f”, when did you go last time? |    |    | years  
|    |    | months

**SECTION B**  
**“HEATH CARE ACCESS”**

**B.1** – When you get sick, who do you seek first?

- a. Physician     b. Nurse     c. Dentist   
d. Pharmacist     e. CHA     f. Preacher   
g. Friend     h. Neighbour     i. Healer   
j. Nobody     k. Other  \_\_\_\_\_

**B.2** – Healthcare servisse of your first choice?

- a. Aid station     b. HRC   
c. IMTC     d. Other   
e. Polyclinic     f. Private clinic   
g. Pharmacy     h. Never went to a healthcare center   
i. Other : \_\_\_\_\_

**B.3** – In the last month, have you gone to a healthcentre?    a. **Y**     b. **N**

**“No”, go to B.8”**

**B.4** – How long did it take to reach the healthcentre? \_\_\_\_\_

**B.5** – Is your health problem solved? **Y**     **N**

**“Yes”, go to B.8**

**B.6** – Why haven’t it been solved?  
\_\_\_\_\_  
\_\_\_\_\_

**B.7** – What did you do to solve the problem?  
\_\_\_\_\_  
\_\_\_\_\_

**B.8** – How do you reach the healthcare c.?

- a. Community boat     b. *Rabeta*     c. Oar canoe   
d. Paying boat     d. Ship     e. Walking   
f. Motorcycle     g. Truck   
h. Other : \_\_\_\_\_

**B.9** - Usual time to reach the healthcare center?

|\_\_| |\_\_| hours |\_\_| |\_\_| minutes

**B.10** – Did you need any disease follow-up in the past?

- a. **Y**     b. **N**

**“No”, go to B.12**

**B.11** – Had any difficulty?

- a. **Y**     b. **N**

c. If “yes”, which one?  
\_\_\_\_\_  
\_\_\_\_\_

**B.12** – When you required a lab test, was it done?

- a. **Y**     b. **N**     c. Never had a test

**“Yes”, go to B.14**

**B.13** – Which problem did you found to get the test?  
\_\_\_\_\_  
\_\_\_\_\_

**B.14** – Did you ever need a consultation and could’nt do it?

- a. **Y**     b. **N**     c. Never need a consultation

**“No”, go to B.16**

**B.15** – Why didn’t you get it?  
\_\_\_\_\_  
\_\_\_\_\_

**B.16** – If a a health professional prescribes you a remedy, do you use to get it?

- a. **Y**     b. **N**     c. Never needed one

**“Yes”, go to next section”**

**B.17** – Why did you not get it?  
\_\_\_\_\_  
\_\_\_\_\_

**SETION C**  
**“ADAPTED AUDIT - RIBEIRINHOS”**

**C.1 – Alcoholic beverages?**

- (0) Nunca  **“NUNCA, vá próxima seção”**  
 (1) Monthly   
 (2) 2 - 4 times / month   
 (3) 2 - 3 times / week   
 (4) 4 or more times/week

**C.2 – When you drink, what do you drink?  
 I \_\_\_\_\_ l. Dosages? (See next page Figure)**

- (0) 0 - 1   
 (1) 2 - 3   
 (2) 4 - 5   
 (3) 6 - 7   
 (4) 8 or more

**C.3 – How many time do you use to have 6 or more doses?**

- (0) Never   
 (1) Less than 1/month   
 (2) Monthly   
 (3) Weekly   
 (4) Daily

**“If adding C.2 and C.3 equals 0, go to C.9 and C.10”**

**C.4 – During the last year, how many time did you think that you will manage to stop drinking?**

- (0) Never   
 (1) Less than 1/month   
 (2) Monthly   
 (3) Weekly   
 (4) Almost daily or daily

**C.5 – During the last year, how many times you could not do anything because you had been drinking?**

- (0) Never   
 (1) Less than 1/month   
 (2) Monthly   
 (3) weekly   
 (4) Almost daily or daily

**C.6 – During the last year, how many times did you feel the need to drink in order to improve after having been drinking the night before?**

- (0) Never   
 (1) Less than 1/month   
 (2) Monthly   
 (3) Weekly   
 (4) Almost daily or daily

**C.7 – During the last year, how many times did you feel remorse for having been drinking?**

- (0) Never   
 (1) Less than 1/month   
 (2) Monthly   
 (3) Weekly   
 (4) Almost daily or daily

**C.8 – During the last year, how many times you were not able to remember what happened after being drinking the night before?**

- (0) Never   
 (1) Less than 1/month   
 (2) Monthly   
 (3) weekly   
 (4) Almost daily or daily

**C.9 – Have you ever hurt or wounded anyone after having been drinking?**

- (0) No   
 (2) Yes, but not during the last year   
 (4) Yes, during the last year

**C.10 – Has any Family member por friend been worried for you or suggested to drink less?**

- (0) No   
 (2) Yes, but not during the last year   
 (4) Yes, during the last year

**SECTION D**  
**“SMOKING HABIT”**

**D.1 – Have you been a smoker (at least 100 cigarettes during your life)? a. Y**

**D.1.1 – What do you use to smoke?**

b. N  **“No”, go to the next Section**

**D.2 – When did you begin to smoke?**

l\_\_l\_\_l years

**D.3 – Do you smoke cigarettes?**

a. Y  (Yes, go to D.5) b. N

**D.4 – When did you quit the smoking habit?**

l\_\_l\_\_l years

**D.5 – How many cigarettes/day do or did you smoke?**

l\_\_l\_\_l cigarettes (if <1, write 0)

**D.6 – How many years have you been smoking?**

l\_\_l\_\_l years (if <1, write 0)

**SECTION E**  
**“SELF-REPORTED DISEASES”**

**E.1** – Your health is?

- a. Very good       b. Good       c. Fair   
d. Bad       e. Very bad

**E.2** – During the last month, did you present any health problem?    a. **Y**       b. **N**

**“No”, go to E.4**

**E.3** – Which was your health problem?

|           | <b>Diseases</b>        | <b>Last month</b>        |
|-----------|------------------------|--------------------------|
| <b>a</b>  | Malaria                | <input type="checkbox"/> |
| <b>b</b>  | Parasitoses            | <input type="checkbox"/> |
| <b>c</b>  | Chagas disease         | <input type="checkbox"/> |
| <b>d</b>  | Hepatitis              | <input type="checkbox"/> |
| <b>e</b>  | Diarrhea               | <input type="checkbox"/> |
| <b>f</b>  | Hjigh blood pressure   | <input type="checkbox"/> |
| <b>g</b>  | Diabetes               | <input type="checkbox"/> |
| <b>h</b>  | Hemorrhage             | <input type="checkbox"/> |
| <b>i</b>  | Cancer                 | <input type="checkbox"/> |
| <b>j</b>  | Rheumatism             | <input type="checkbox"/> |
| <b>k</b>  | Heart disease          | <input type="checkbox"/> |
| <b>l</b>  | Kidney disease         | <input type="checkbox"/> |
| <b>m</b>  | Eye disease            | <input type="checkbox"/> |
| <b>n</b>  | Allergy                | <input type="checkbox"/> |
| <b>o</b>  | Asthma                 | <input type="checkbox"/> |
| <b>p</b>  | Anemia                 | <input type="checkbox"/> |
| <b>q</b>  | Flu                    | <input type="checkbox"/> |
| <b>r</b>  | Lung disease           | <input type="checkbox"/> |
| <b>s</b>  | Urinary infection      | <input type="checkbox"/> |
| <b>t</b>  | Tonsilitis             | <input type="checkbox"/> |
| <b>u</b>  | Dizziness / vertigo    | <input type="checkbox"/> |
| <b>v</b>  | Heartburn              | <input type="checkbox"/> |
| <b>x</b>  | Vomiting               | <input type="checkbox"/> |
| <b>z</b>  | Short breath           | <input type="checkbox"/> |
| <b>w</b>  | Feeling weak           | <input type="checkbox"/> |
| <b>aa</b> | Head pressure          | <input type="checkbox"/> |
| <b>ab</b> | Fever                  | <input type="checkbox"/> |
| <b>ac</b> | Colic/cramps           | <input type="checkbox"/> |
| <b>ad</b> | Mental simptoms        | <input type="checkbox"/> |
| <b>ae</b> | Depression             | <input type="checkbox"/> |
|           | Other, please, detail: |                          |
| <b>af</b> |                        | <input type="checkbox"/> |
| <b>ag</b> |                        | <input type="checkbox"/> |
| <b>ah</b> |                        | <input type="checkbox"/> |
| <b>ai</b> |                        | <input type="checkbox"/> |
| <b>aj</b> |                        | <input type="checkbox"/> |
| <b>ak</b> |                        | <input type="checkbox"/> |
| <b>al</b> | Pain (please specify): | <input type="checkbox"/> |
|           |                        |                          |
|           |                        |                          |

**E.4** – Have you ever felt pain or discomfort on the heart zone?

- a. **Y**     b. **N**     **“No” go to the next Section”**

**E.5** – This discomfort uses to appear when you are walking quickly or are working?

- a. **Y**       b. **N**

**E.6** – This discomfort uses to appear when you are walking slowly? a. **Y**       b. **N**

**“FIGURE AUDIT”**

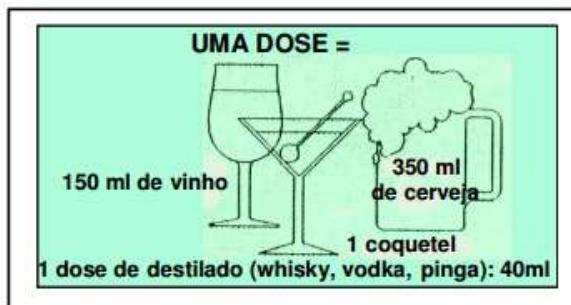

**SECTION F**  
**“INFORMATIONS ON MEDICINES**  
**CONSUMPTION”**

**F.1** – Do you use “pharmacy remedies” on your own? a. **Y**  b. **N**

**F.2** – Do you keep any “pharmacy remedy” at home? a. **Y**  b. **N**   
**“No”, go to E.5”**

**F.3** – Where do you keep your “pharmacy remedies” (ask to show the place)?  
\_\_\_\_\_  
\_\_\_\_\_

**⇒ IF POSSIBLE, ASK FOR THE MEDICINE CABINET.**

**F.4** – Characteristics of the place where the “pharmacy remedies” are kept (**interviewer observation**)?

- a. Direct contact with sun or sunny place
- b. Direct contact with humidity
- c. Direct contact with heat
- d. Additional observations:  
\_\_\_\_\_  
\_\_\_\_\_

**F.5** – How do you identify your “pharmacy remedies”?

- a. Color  b. Size  c. Shape
- d. Name  e. Box
- f. Do not identify them
- g. Other : \_\_\_\_\_

**F.6** – Do you use to read the leaflet or do you ask someone else to read them for you?

- a. **Y**  b. **N**

**F.7** – Do you think that “pharmacy remedies” could be risky for your health?

- a. **Y**  b. **N**

**F.8** – Do you use to look at the validity date of your “pharmacy remedies”?

- a. **Y**  b. **N**

**F.9** – Have you ever taken an expired “pharmacy remedy”?

- a. **Y**  b. **N**  c. **I do not know**

**F.10** – When any “pharmacy remedy” has expired, where do you use to throw it away?  
\_\_\_\_\_  
\_\_\_\_\_

**F.11** – Do you use to keep “pharmacy remedies” in their box? a. **Y**  b. **N**

**F.12** – Do you use to remove the tablets or pills from the blister to keep them in another place? a. **Y**  b. **N**

**F.13** – Do you use to take advantage of the empty jars of remedies? a. **Y**  b. **N**

**F.14** – Have you used a home remedy during the last month? a. **Y**  b. **N**   
**“No”, go to F.18**

**F.15** – Which home remedy did you use?  
\_\_\_\_\_  
\_\_\_\_\_

**F.16** – What did you use that home remedy for?  
\_\_\_\_\_  
\_\_\_\_\_

**F.17** – Who told you how to use it?  
\_\_\_\_\_  
\_\_\_\_\_

**F.18** – Each time you feel ill, you prefer to use:

- a. Home remedy
- b. Pharmacy remedy
- c. Both
- d. I do not use anything

**F.19** – Why?  
\_\_\_\_\_  
\_\_\_\_\_

**F.20** – During the last month, have you taken any remedy or medicine? a. **Y**  b. **N**

**“If no medicine was taken, then GO TO THE NEXT SECTION”**

**⇒ IF THE INTERVIEWEE HAD TAKEN ANY PHARMACY REMEDY, ASK HIM/HER TO SHOW THE MEDICAL RECIPE (IF THERE IS ONE) AND THE MEDICINE.**

**⇒ PLEASE FEEL THE BOX BELOW WITH THE INFORMATIONS GIVEN BY THE INTERVIEWEE.**

| PHARMACY REMEDY (ALLOPATHIC MEDICINE) |                                                     |                                                                                                                                                                                                                                                          |                                                                                                                                                                                                                                                                                                                                                                    |                                                                                                                                                                                                                                                                                                                                                                        |                          |
|---------------------------------------|-----------------------------------------------------|----------------------------------------------------------------------------------------------------------------------------------------------------------------------------------------------------------------------------------------------------------|--------------------------------------------------------------------------------------------------------------------------------------------------------------------------------------------------------------------------------------------------------------------------------------------------------------------------------------------------------------------|------------------------------------------------------------------------------------------------------------------------------------------------------------------------------------------------------------------------------------------------------------------------------------------------------------------------------------------------------------------------|--------------------------|
| Ord.                                  | F.21                                                | F.22                                                                                                                                                                                                                                                     | F.23                                                                                                                                                                                                                                                                                                                                                               | F.24                                                                                                                                                                                                                                                                                                                                                                   | F.25                     |
|                                       | Name of the "pharmacy remedy" (allopathic medicine) | Time in use                                                                                                                                                                                                                                              | Who prescribed?                                                                                                                                                                                                                                                                                                                                                    | Where did you get it?                                                                                                                                                                                                                                                                                                                                                  | What did you use it for? |
| a                                     | _____                                               | Days <input type="checkbox"/> <input type="checkbox"/> <input type="checkbox"/><br>Months <input type="checkbox"/> <input type="checkbox"/> <input type="checkbox"/><br>Years <input type="checkbox"/> <input type="checkbox"/> <input type="checkbox"/> | (a) Physician <input type="checkbox"/> (b) Dentist <input type="checkbox"/><br>(c) Pharmacist <input type="checkbox"/> (d) Nurse <input type="checkbox"/> (e)<br>CHA <input type="checkbox"/> (f) His/her own <input type="checkbox"/><br>(g) Friend/Neighbor <input type="checkbox"/> (h) Family <input type="checkbox"/><br>(i) Other <input type="checkbox"/> : | (a) Pharmacy <input type="checkbox"/> (b) Health Center <input type="checkbox"/><br>(c) Hospital <input type="checkbox"/> (d) IMTC <input type="checkbox"/> (e) Polyclinic <input type="checkbox"/><br>(f) ACS <input type="checkbox"/> (g) Friend/neighbor <input type="checkbox"/><br>(h) Family <input type="checkbox"/> (i) Other <input type="checkbox"/> : _____ | _____                    |
| b                                     | _____                                               | Days <input type="checkbox"/> <input type="checkbox"/> <input type="checkbox"/><br>Months <input type="checkbox"/> <input type="checkbox"/> <input type="checkbox"/><br>Years <input type="checkbox"/> <input type="checkbox"/> <input type="checkbox"/> | (a) Physician <input type="checkbox"/> (b) Dentist <input type="checkbox"/><br>(c) Pharmacist <input type="checkbox"/> (d) Nurse <input type="checkbox"/> (e)<br>CHA <input type="checkbox"/> (f) His/her own <input type="checkbox"/><br>(g) Friend/Neighbor <input type="checkbox"/> (h) Family <input type="checkbox"/><br>(i) Other <input type="checkbox"/> : | (a) Pharmacy <input type="checkbox"/> (b) Health Center <input type="checkbox"/><br>(c) Hospital <input type="checkbox"/> (d) IMTC <input type="checkbox"/> (e) Polyclinic <input type="checkbox"/><br>(f) ACS <input type="checkbox"/> (g) Friend/neighbor <input type="checkbox"/><br>(h) Family <input type="checkbox"/> (i) Other <input type="checkbox"/> : _____ | _____                    |
| c                                     | _____                                               | Days <input type="checkbox"/> <input type="checkbox"/> <input type="checkbox"/><br>Months <input type="checkbox"/> <input type="checkbox"/> <input type="checkbox"/><br>Years <input type="checkbox"/> <input type="checkbox"/> <input type="checkbox"/> | (a) Physician <input type="checkbox"/> (b) Dentist <input type="checkbox"/><br>(c) Pharmacist <input type="checkbox"/> (d) Nurse <input type="checkbox"/> (e)<br>CHA <input type="checkbox"/> (f) His/her own <input type="checkbox"/><br>(g) Friend/Neighbor <input type="checkbox"/> (h) Family <input type="checkbox"/><br>(i) Other <input type="checkbox"/> : | (a) Pharmacy <input type="checkbox"/> (b) Health Center <input type="checkbox"/><br>(c) Hospital <input type="checkbox"/> (d) IMTC <input type="checkbox"/> (e) Polyclinic <input type="checkbox"/><br>(f) ACS <input type="checkbox"/> (g) Friend/neighbor <input type="checkbox"/><br>(h) Family <input type="checkbox"/> (i) Other <input type="checkbox"/> : _____ | _____                    |
| d                                     | _____                                               | Days <input type="checkbox"/> <input type="checkbox"/> <input type="checkbox"/><br>Months <input type="checkbox"/> <input type="checkbox"/> <input type="checkbox"/><br>Years <input type="checkbox"/> <input type="checkbox"/> <input type="checkbox"/> | (a) Physician <input type="checkbox"/> (b) Dentist <input type="checkbox"/><br>(c) Pharmacist <input type="checkbox"/> (d) Nurse <input type="checkbox"/> (e)<br>CHA <input type="checkbox"/> (f) His/her own <input type="checkbox"/><br>(g) Friend/Neighbor <input type="checkbox"/> (h) Family <input type="checkbox"/><br>(i) Other <input type="checkbox"/> : | (a) Pharmacy <input type="checkbox"/> (b) Health Center <input type="checkbox"/><br>(c) Hospital <input type="checkbox"/> (d) IMTC <input type="checkbox"/> (e) Polyclinic <input type="checkbox"/><br>(f) ACS <input type="checkbox"/> (g) Friend/neighbor <input type="checkbox"/><br>(h) Family <input type="checkbox"/> (i) Other <input type="checkbox"/> : _____ | _____                    |
| e                                     | _____                                               | Days <input type="checkbox"/> <input type="checkbox"/> <input type="checkbox"/><br>Months <input type="checkbox"/> <input type="checkbox"/> <input type="checkbox"/><br>Years <input type="checkbox"/> <input type="checkbox"/> <input type="checkbox"/> | (a) Physician <input type="checkbox"/> (b) Dentist <input type="checkbox"/><br>(c) Pharmacist <input type="checkbox"/> (d) Nurse <input type="checkbox"/> (e)<br>CHA <input type="checkbox"/> (f) His/her own <input type="checkbox"/><br>(g) Friend/Neighbor <input type="checkbox"/> (h) Family <input type="checkbox"/><br>(i) Other <input type="checkbox"/> : | (a) Pharmacy <input type="checkbox"/> (b) Health Center <input type="checkbox"/><br>(c) Hospital <input type="checkbox"/> (d) IMTC <input type="checkbox"/> (e) Polyclinic <input type="checkbox"/><br>(f) ACS <input type="checkbox"/> (g) Friend/neighbor <input type="checkbox"/><br>(h) Family <input type="checkbox"/> (i) Other <input type="checkbox"/> : _____ | _____                    |
| f                                     | _____                                               | Days <input type="checkbox"/> <input type="checkbox"/> <input type="checkbox"/><br>Months <input type="checkbox"/> <input type="checkbox"/> <input type="checkbox"/><br>Years <input type="checkbox"/> <input type="checkbox"/> <input type="checkbox"/> | (a) Physician <input type="checkbox"/> (b) Dentist <input type="checkbox"/><br>(c) Pharmacist <input type="checkbox"/> (d) Nurse <input type="checkbox"/> (e)<br>CHA <input type="checkbox"/> (f) His/her own <input type="checkbox"/><br>(g) Friend/Neighbor <input type="checkbox"/> (h) Family <input type="checkbox"/><br>(i) Other <input type="checkbox"/> : | (a) Pharmacy <input type="checkbox"/> (b) Health Center <input type="checkbox"/><br>(c) Hospital <input type="checkbox"/> (d) IMTC <input type="checkbox"/> (e) Polyclinic <input type="checkbox"/><br>(f) ACS <input type="checkbox"/> (g) Friend/neighbor <input type="checkbox"/><br>(h) Family <input type="checkbox"/> (i) Other <input type="checkbox"/> : _____ | _____                    |
| g                                     | _____                                               | Days <input type="checkbox"/> <input type="checkbox"/> <input type="checkbox"/><br>Months <input type="checkbox"/> <input type="checkbox"/> <input type="checkbox"/><br>Years <input type="checkbox"/> <input type="checkbox"/> <input type="checkbox"/> | (a) Physician <input type="checkbox"/> (b) Dentist <input type="checkbox"/><br>(c) Pharmacist <input type="checkbox"/> (d) Nurse <input type="checkbox"/> (e)<br>CHA <input type="checkbox"/> (f) His/her own <input type="checkbox"/><br>(g) Friend/Neighbor <input type="checkbox"/> (h) Family <input type="checkbox"/><br>(i) Other <input type="checkbox"/> : | (a) Pharmacy <input type="checkbox"/> (b) Health Center <input type="checkbox"/><br>(c) Hospital <input type="checkbox"/> (d) IMTC <input type="checkbox"/> (e) Polyclinic <input type="checkbox"/><br>(f) ACS <input type="checkbox"/> (g) Friend/neighbor <input type="checkbox"/><br>(h) Family <input type="checkbox"/> (i) Other <input type="checkbox"/> : _____ | _____                    |

## SECTION H “NUTRITION DATA”

H.1 – How many meals did you have daily (take into account breakfast, lunch, snacks and dinner)? \_\_\_\_

H.2 – How many times per week do you eat the following foods?

| Ord. | FOODS                                                      | Nerver<br>or<br>almost<br>never | 1x/<br>month | 2 x/<br>month | 1x/<br>week | 2-3 x/<br>week | 4-5x/<br>week | Daily |
|------|------------------------------------------------------------|---------------------------------|--------------|---------------|-------------|----------------|---------------|-------|
| 1    | Red meat (beef)                                            |                                 |              |               |             |                |               |       |
| 2    | Red meat (pork)                                            |                                 |              |               |             |                |               |       |
| 3    | Red meat (games)                                           |                                 |              |               |             |                |               |       |
| 4    | Poultry (chicken, hen, duck)                               |                                 |              |               |             |                |               |       |
| 5    | Fish                                                       |                                 |              |               |             |                |               |       |
| 6    | Eggs                                                       |                                 |              |               |             |                |               |       |
| 7    | Beans                                                      |                                 |              |               |             |                |               |       |
| 8    | Rice or pasta                                              |                                 |              |               |             |                |               |       |
| 9    | Bread or flour (mandioca, beiju, rosca)                    |                                 |              |               |             |                |               |       |
| 10   | Milk                                                       |                                 |              |               |             |                |               |       |
| 11   | Leaves (lettuce, cabbage, etc)                             |                                 |              |               |             |                |               |       |
| 12   | Legumes (carrot, jerimum, beetroot, etc)                   |                                 |              |               |             |                |               |       |
| 13   | Tubercles (macaxeira, cará, potato)                        |                                 |              |               |             |                |               |       |
| 14   | Fruits or natural fruit juice                              |                                 |              |               |             |                |               |       |
| 15   | Açaí                                                       |                                 |              |               |             |                |               |       |
| 16   | Pupunha                                                    |                                 |              |               |             |                |               |       |
| 17   | Tucumã                                                     |                                 |              |               |             |                |               |       |
| 18   | Guaraná natural                                            |                                 |              |               |             |                |               |       |
| 19   | Castanha                                                   |                                 |              |               |             |                |               |       |
| 20   | Sugar                                                      |                                 |              |               |             |                |               |       |
| 21   | Sweets (chocolates, chewing-gum, lollipop)                 |                                 |              |               |             |                |               |       |
| 22   | Processed products (canned meat, sausages, apetizers, etc) |                                 |              |               |             |                |               |       |
